# Supplementary material for: The Tumor-Promoting Role of Neutrophil Extracellular Traps in Esophageal Squamous Cell Carcinoma and Their Interaction with the Gut Microbiota
Source: Research Square preprint supplement (doi:10.21203/rs.3.rs-6203794/v1), 2025-03-17
Supplement: Supplementary file 1 [file 27805f8d5b61a9cf6366341b.docx]

**SupplementaryTable 3**

Analysis of CitH3 Levels in the ESCC Patient Group

| **Characteristic** | **No. of cases** | **CitH3** | ***P-value*** |
| --- | --- | --- | --- |
| Gender |  |  | 0.786 |
| Male | 36 | 202.87±13.66 |  |
| Female | 24 | 204.01±18.77 |  |
| Age (years) |  |  | 0.043 |
| ≤60 | 22 | 197.94±20.40 |  |
| >60 | 38 | 206.44±11.50 |  |
| Tumor length diameter (cm) |  |  | 0.028 |
| <3 | 23 | 197.72±14.80 |  |
| ≥3 | 37 | 206.81±15.51 |  |
| Lymphatic node transfer |  |  | 0.038 |
| Yes | 29 | 207.67±13.94 |  |
| No | 31 | 199.26±16.48 |  |
| Pathological staging |  |  | 0.006 |
| I | 12 | 195.49±16.18 |  |
| II | 28 | 200.55±13.51 |  |
| III | 20 | 211.92±15.23 |  |

Analysis of MPO Levels in the ESCC Patient Group

| **Characteristic** | **No. of cases** | **MPO** | ***P-value*** |
| --- | --- | --- | --- |
| Gender |  |  | 0.223 |
| Male | 36 | 22.38±2.58 |  |
| Female | 24 | 23.29±3.07 |  |
| Age (years) |  |  | 0.015 |
| ≤60 | 22 | 21.61±2.11 |  |
| >60 | 38 | 23.40±2.96 |  |
| Tumor length diameter (cm) |  |  | <0.001 |
| <3 | 23 | 20.99±2.02 |  |
| ≥3 | 37 | 23.73±2.82 |  |
| Lymphatic node transfer |  |  | 0.013 |
| Yes | 29 | 23.66±2.86 |  |
| No | 31 | 21.89±2.49 |  |
| Pathological staging |  |  | <0.001 |
| I | 12 | 20.70±1.87 |  |
| II | 28 | 21.92±1.80 |  |
| III | 20 | 25.12±2.84 |  |

Analysis of NE Levels in the ESCC Patient Group

| **Characteristic** | **No. of cases** | **NE** | ***P-value*** |
| --- | --- | --- | --- |
| Gender |  |  | 0.104 |
| Male | 36 | 1.56±0.50 |  |
| Female | 24 | 1.81±0.67 |  |
| Age (years) |  |  | 0.011 |
| ≤60 | 22 | 1.42±0.45 |  |
| >60 | 38 | 1.80±0.60 |  |
| Tumor length diameter (cm) |  |  | 0.017 |
| <3 | 23 | 1.44±0.48 |  |
| ≥3 | 37 | 1.80±0.60 |  |
| Lymphatic node transfer |  |  | 0.003 |
| Yes | 29 | 1.89±0.59 |  |
| No | 31 | 1.45±0.49 |  |
| Pathological staging |  |  | 0.039 |
| I | 12 | 1.39±0.35 |  |
| II | 28 | 1.61±0.52 |  |
| III | 20 | 1.90±0.69 |  |
