# Supplementary material for: The Tumor-Promoting Role of Neutrophil Extracellular Traps in Esophageal Squamous Cell Carcinoma and Their Interaction with the Gut Microbiota
Source: Research Square preprint supplement (doi:10.21203/rs.3.rs-6203794/v1), 2025-03-17
Supplement: Supplementary file 2 [file 7dc4ed9cd605af12adae9c19.docx]

**SupplementaryTable 1. The sequences of primers for qRT-PCR**

| Gene | Sequence |
| --- | --- |
| GAPDH | F: 5'-GAACGGGAAGCTCACTGG-3'  R: 5'-GCCTGCTTCACCACCTTCT-3' |
| CitH3 | F: 5'-TCCGCCGTTATCAGAAGTCCAC-3'  R: 5'-GCTCTGGAAACGCAGGTCTGTT-3' |
| MPO | F: 5'-GAGCAGGACAAATACCGCACCA-3’  R: 5'-AGAGAAGCCGTCCTCATACTCC-3’ |
| NE | F: 5'-TGCGCCCAACTTCGTCATGTCG-3'  R: 5'-CGTAGCCGTTTTCGAAGATGCG-3' |
