# Supplementary material for: The Tumor-Promoting Role of Neutrophil Extracellular Traps in Esophageal Squamous Cell Carcinoma and Their Interaction with the Gut Microbiota
Source: Research Square preprint supplement (doi:10.21203/rs.3.rs-6203794/v1), 2025-03-17
Supplement: Supplementary file 3 [file b38b85effc3ad6459793e57e.docx]

**SupplementaryTable 2. Information on antibodies used in this study**

| **Antibody** | **IHC** | **Western blot** | **Specificity** | **Company** |
| --- | --- | --- | --- | --- |
| CitH3 | 1:250 | 1:8000 | Rabbit | Proteintech |
| MPO | 1:300 | 1:3000 | Rabbit | Proteintech |
| NE | 1:200 | 1:700 | Rabbit | Proteintech |
| GAPDH | **/** | 1:250000 | Mouse | Proteintech |
| β-Actin | **/** | 1:50000 | Mouse | Proteintech |
| Vinclin | **/** | 1:1000 | Rabbit | Cell Signaling Technology |
| N-Cadherin | **/** | 1:4000 | Rabbit | Proteintech |
| E-Cadherin | **/** | 1:100000 | Rabbit | Proteintech |
| Vimentin | **/** | 1:60000 | Mouse | Proteintech |
| MMP2 | **/** | 1:3000 | Rabbit | Abcam |
| MMP9 | **/** | 1:10000 | Rabbit | Abcam |
| HIF-1α | **/** | 1:6000 | Rabbit | Proteintech |
| TNF-α | **/** | 1:1500 | Rabbit | Abcam |
| NF-кB(p65) | **/** | 1:5000 | Rabbit | Abcam |
| p-NF-кB(p-p65) | **/** | 1:6000 | Rabbit | Abcam |
| Ikkβ | **/** | 1:5000 | Rabbit | Abcam |
| p-Ikkβ | **/** | 1:1000 | Rabbit | Cell Signaling Technology |
| IκBα | **/** | 1:60000 | Rabbit | Abcam |
| p-IκBα | **/** | 1:10000 | Rabbit | Abcam |
| VEGF | **/** | 1:2000 | Mouse | R&D Systems |
| VEGFA | **/** | 1:20000 | Rabbit | Proteintech |
| Ang-Ⅰ | **/** | 1:25000 | Rabbit | Abcam |
| Ang-Ⅱ | **/** | 1:5000 | Rabbit | Abcam |
